# Supplementary material
Source: PubMed Central journal article supplement (PMC3571301)
Supplement: EC.00304-12_zek999094057so1.pdf [file EC.00304-12_zek999094057so1.pdf]

1 **SUPPLEMENTAL FIGURE LEGENDS**

2

3 FIG S1. Sequence alignment of Erv1 orthologs from a taxonomically diverse range of  
4 eukaryotes. Sequences were aligned in CLUSTALW; residues encompassing the core, flavin-  
5 binding five-helix bundle are boxed; proximal cysteine pairs are highlighted in blue; distal  
6 cysteine pairs are highlighted in red; the cysteine pair that contributes thermostability in Erv1  
7 from yeast, and likely other Erv1 proteins, is yellow. H66 and Y70 in TbERV1 which could be  
8 predicted to form an 'O<sub>2</sub> channel' are in bold; where H, rather than D, is present at the analogous  
9 position in other Erv1 proteins this is also shown in bold. The alignment also reveals that  
10 although it is not unprecedented for the distal cysteine pair to be C-terminal, the C-terminal  
11 extension downstream of the flavin-binding domain is uniquely long in trypanosomatid Erv1.  
12 Cm, *Cyanidioschyzon merolae*; Dd, *Dictyostelium discoideum*; Ec, *Encephalitozoon cuniculi*;  
13 Lm, *Leishmania major*; Ot, *Ostreococcus tauri*; Ps, *Phytophthora sojae*; Sc, *Saccharomyces*  
14 *cerevisiae*; Tb, *Trypanosoma brucei*; Tt, *Tetrahymena thermophila*.

15

16 FIG S2. Circular dichroism analysis of *in vitro*-folded recombinant TbERV1 variants.

17 Circular dichroism spectra reveal a similar overall fold for *in vitro*-folded recombinant TbERV1  
18 and the site-directed mutant proteins that were subjected to kinetic analysis (Tables 1 and 2).  
19 Spectra are normalized for protein concentration. Solid line – wild type *T. brucei* Erv1; Short  
20 dashes – proximal variant (C60S/C63S) *T. brucei* Erv1; Long dashes – 'O<sub>2</sub> channel' variant  
21 (H66D/Y70R) *T. brucei* Erv1; Mixed dashes - distal variant (C261S/C265S) *T. brucei* Erv1.

22

23 FIG S3. Protein stained SDS-PAGE (left) and anti-Erv1 Western Blot (right) of purified *T.*  
24 *brucei* Erv1 and variants

25 In each analysis, lane M is molecular weight markers, lane 1 is wild type TbERV1, lane 2 is the  
26 proximal (C60S/C63S) variant, lane 3 is the distal (C261S/C265S) variant and lane 4 is the  
27 channel (H66D/Y70R) variant. The proportion of protein present as full length and degradation  
28 products is different in each ERV1 variant. Lane 2-4 were each loaded with the same amount of  
29 protein (75 pmol for the protein stained SDS-PAGE, 25 pmol for the Western Blot). Molecular  
30 weights of the markers (in kDa) are indicated.

31

32 FIG S4. Mitochondrial swelling is not seen following RNAi knockdown of components of the  
33 mitochondrial and cytosolic Fe-S cluster assembly pathways.

34 For each mutant analyzed RNAi induction is lethal. Thus, cells were fixed and processed for  
35 TEM in the same way as the *TbERV1* RNAi mutants shown in FIG 5., 24 h before cultures  
36 ceased growth. Longitudinal sections through representative individual cells induced for RNAi  
37 against *TbNBP35* (A), *TbFRAT* (B), *TbATMI* (C), *TbCFD1* (D) or *TbISA1+TbISA2* (E). Scale  
38 bars represent 1  $\mu$ m.

39

Sc -----MKAIDKMTDNPPEGLSGRKIIYDEDGK 28  
 Dd MAFGNKINQILDEKSHITTPATTENENKKNKNVEITTIKKASFLSKDITNEDEDDCGT 60  
 Tt -----MSYSEQEKKKDCPEVV 17  
 Ps -----  
 Tb -----  
 Lm -----  
 Ec -----M 1  
 Cm ----MSRSVWFEKLRAGIGTVATPLPLPNTAIRRSQSWRRFVARTIVAFITVAGLATIA 56  
 Ot -----

Sc P**CRS**CNTLLDFQYVTGKISNGLKNLSSNGKLAGTGALTGEASELMPGSRTYRKVDPDVE 88  
 Dd EL**LG**VTEKKNQMFQ**MIS**INNNNNNNNNNGNNDNKNNE**DSKY**WEPMPSPPTTI 120  
 Tt **CE**KSDPLGTYR**KA**Q**QPK**TM**FK**DE**DD**DDHSN**SS**GELEK**SE**DKVA**QDD**--PYKYCPNNKQ 75  
 Ps -----MVATKSDPN**C**VEPA**C**ADKMDFFKSSMGKKATKPA**Q**PK--PATD**C**PLDRQ 48  
 Tb -----MSKQ**E**PLQ**KI**PG**E**CP-TPR 18  
 Lm -----MSDDDVHERLTTIP**G**EC**P**-TP**L** 21  
 Ec KREQSTGRILVVLAAAWV**TY**RCYGLMVRDREGK**V**SEL**GG**SGKSENPRTEKLS**K**EIRE 61  
 Cm WHSSSWREAVFP**T**K**V**FSQASTEAAAA**AP**D**T**ARA**AP**GLPR**T**MLTK**AP**G**KI**PFQ**DE**K**P**PT**R**A 116  
 Ot MSSNERRHTVHTG**PL**AG**L**R**D**A**F**AR**L**NR**G**Q**R**GETSG**K**V**T**DS**K**TSS**K**R**N**AS**D**K**A**D**T**Q**R**TS**R**E 60

Sc Q**L**GRSSW**TL**LLHSVAASYP**AQ**PTD**Q**Q**G**EM**K**Q**FL**NI**F**SHI**Y**PC**NW****C**AKDFEKYI**R**EN**A**P**Q**V 148  
 Dd ELGNSG**W**TL**L**H**T**IAAY**Y**PE**K**P**S**E**K**K**K**Q**D**IK**E**FL**Q**S**F**SK**V**Y**P**CK**V****C**AKDFREIM**K**ET**P**PI**L** 180  
 Tt SLG**F**FT**W**N**F**L**H**T**M**AI**Y**Y**P**K**N**P**T**EE**E**Q**Q**K**M**K**N**F**D**S**F**AT**F**Y**P**CK**P****C**AL**H**F**Q**K**D**IL**K**T**P**PA**V** 135  
 Ps ELGNAT**W**GL**L**HS**M**GI**Y**Y**P**DK**P**SE**Y**Q**A**K**A**K**T**F**I**E**A**L**A**L**M**Y**P**CV**H****C**AD**D**F**Q**KEI**A**K**S**PP**R**V 108  
 Tb ELG**K**AG**W**I**L**HS**A**AA**V**F**P**Y**N**P**T**Q**Q**E**A**FR**N**FL**H**GW**S**H**A**Y**A**CS**H****C**AY**H**M**R**R**Y**F**H**Q**N**PP**V**V 78  
 Lm ELG**M**SG**W**N**L**HS**A**AV**Y**Y**P**K**P**SA**V**Q**T**AM**K**N**F**IES**W**A**H**V**Y**AC**SW****C**AY**H**M**R**E**Y**VR**D**H**S**PD**V** 81  
 Ec RLGR**S**T**W**TL**L**H**T**M**G**AR**Y**PA**F**PT**Y**Q**Q**K**D**TL**S**F**I**HL**L**SS**V**F**P**CG**E****C**T**K**H**F**Q**K**LL**S**D**Y**PP**R**V 121  
 Cm ELGRAG**W**TL**L**HS**I**AAN**Y**PE**V**AT**P**EM**Q**T**H**AR**Q**F**I**AS**F**AAL**Y**PC**P**T**C**RE**H**F**Q**GY**V**R**T**HP**P**AL 176  
 Ot DLGRAT**W**P**F**L**H**T**L**AA**Q**F**P**EE**P**TR**Q**ER**D**ARE**L**IG**M**TR**L**Y**P**CG**E****C**AR**H**F**E**E**I**VR**K**N**P**PD**C** 120  
 \*\* \* :\*: . :\* .: : : : :.\* \* .:. . .\*

Sc ESREELGR**W**MC**E**AHN**K**V**N**K**L**R**K**PK**F**DC**N**---FWEKRWKDGWDE----- 189  
 Dd DSQ**N**DFAL**W**LC**N**AH**N**N**V**N**L**Q**L**G**K**PT**F**DC**N**---LINKRWKINN**N**EFH----- 224  
 Tt ES**N**ESLS**I**W**L**CE**R**H**N**L**V**N**K**W**L**G**K**Q**F**DC**S**FE-NLEK**R**W**R**T**G**Y**D**H**C**K---DQ**V**T**K**L**Q**--- 187  
 Ps ES**R**T**T**F**S**M**W**LC**E**Q**H**N**I**V**N**R**K**I**H**K**P**LF**E**CT**M**E-KLEER**W**R**K**G**K**P**S**W**G**E**D**G**E**ES**A**Q**D**AL**G** 167  
 Tb TD**K**L**A**L**N**R**Y**LC**E**F**H**NA**V**NER**V**G**N**K**I**Y**D**CP**M**-N**V**L**R**R**W**H**P**T**F**P-D**M**E**D**Q**P**T**I**E**E**Q**V**K**S**L**E** 136  
 Lm RD**K**L**T**V**S**R**Y**VC**E**M**H**ND**V**N**R**L**G**K**D**V**F**DC**S**PS-V**V**L**R**R**W**H**P**G**Y**PN**K**M**E**D**T**P**T**I**E**E**Q**L**A**S**D** 140  
 Ec GS**N**E**E**F**K**T**W**LC**E**V**H**N**V**N**R**R**L**G**K**T**V**V**D**CR---TV**D**E**I**W**D**CG**C**E**A**----- 162  
 Cm ES**R**E**Q**F**V**K**W**CB**R**AH**N**AV**N**L**R**L**G**K**P**T**I**PC**T**DL**Q**L**L**D**K**R**W**R**D**CH**C**DE**Q**EP**Q**N**M**I**R**AAR**L**L**I**E 236  
 Ot TS**G**L**E**L**Q**R**W**MC**E**V**H**NE**V**NT**S**L**G**K**P**MF**D**CA**K**TS**Q**R**S**R**L**DC**D**G**D**G**E**L**T**GC**S**L**E**DR**R**R**R**L**T**R 180  
 . . : \* . \*\* \* : : \*

Sc -----  
 Dd -----  
 Tt -----  
 Ps -----  
 Tb LKE-----KN**E**TP**Q**GV**S**DR**W**R**Q**NS**S**AS**P**D**G**N**V**GR**S**VG**D**AR 173  
 Lm RE**K**ST**A**KE**A**TH**H**Q**Q**E**E**R**R**F**S**R**L**GL**H**ARE**A**AR**N**E**A**V**A**WR**D**AS**E**T**A**SK**K**AD**G**L**W**SW**R**I**F**R 200  
 Ec -----  
 Cm SR**R**EP**N**AG----- 243  
 Ot -----

Sc -----  
 Dd -----  
 Tt -----  
 Ps -----  
 Tb **W**T**D**T**S**ES**R**RT**N**--V**G**E**I**S**A**G-----**W**G**T**A**G**E**K**M**Q**R**N**S**A**G**D**GV**S**D**A**G**A**SE**K**----**K**W**W** 221  
 Lm **K**P**V**L**G**T**D**A**A**K**S**N**A**L**P**G**T**N**S**SP**P**PT**T**Q**Y**K**P**S**I**SS**S**D**A**L**N**T**P**ST**G**A**V**A**T**A**A**S**D**V**G**A**A**H**P**R**H** 260  
 Ec -----  
 Cm -----  
 Ot -----

Sc -----  
 Dd -----  
 Tt -----  
 Ps -----  
 Tb **R**W**G**N**S**T**S**S**T**T**A**T**I**AT**P**SA**A**E**P**A**E**D**V**E**A**S**V**T**S**I**L**S**K**L**R**A**C**M**V**Y**C**P**D**D**K**K**S**A 273  
 Lm **S**W**S**T**P**T**S**E**A**H**N**S**F**L**M**P**T**S**S**H**G**A**A**D**A**D**T**D**I**D**A**V**L**K**R**L**K**Q**C**Q**V**Y**C**P**E**D**E**L**K**L 312  
 Ec -----  
 Cm -----  
 Ot -----

Figure S1

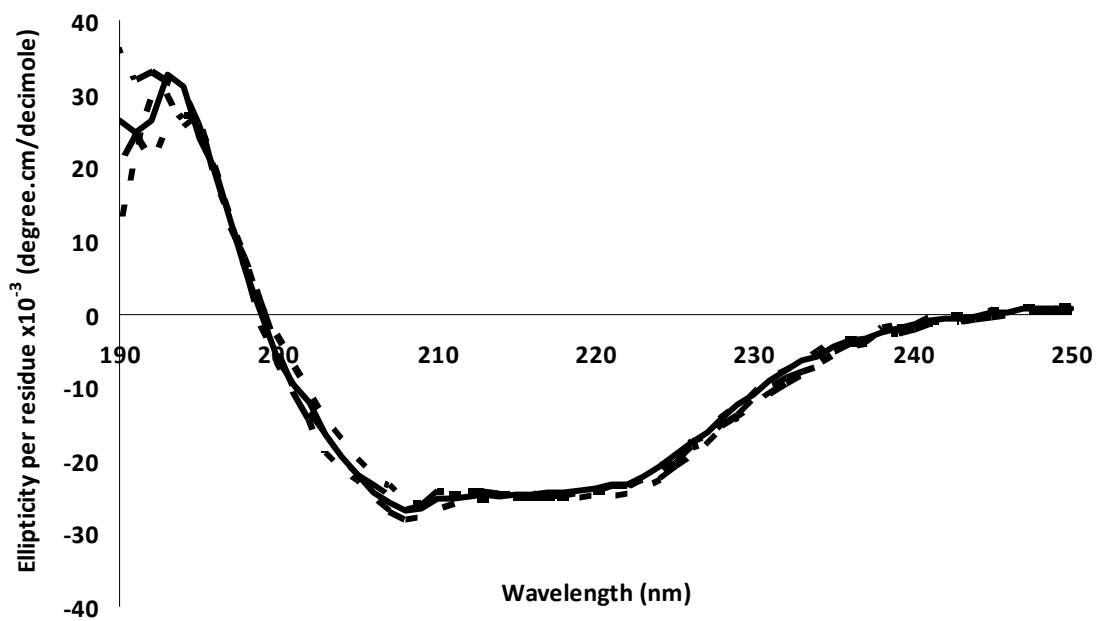

Figure S2

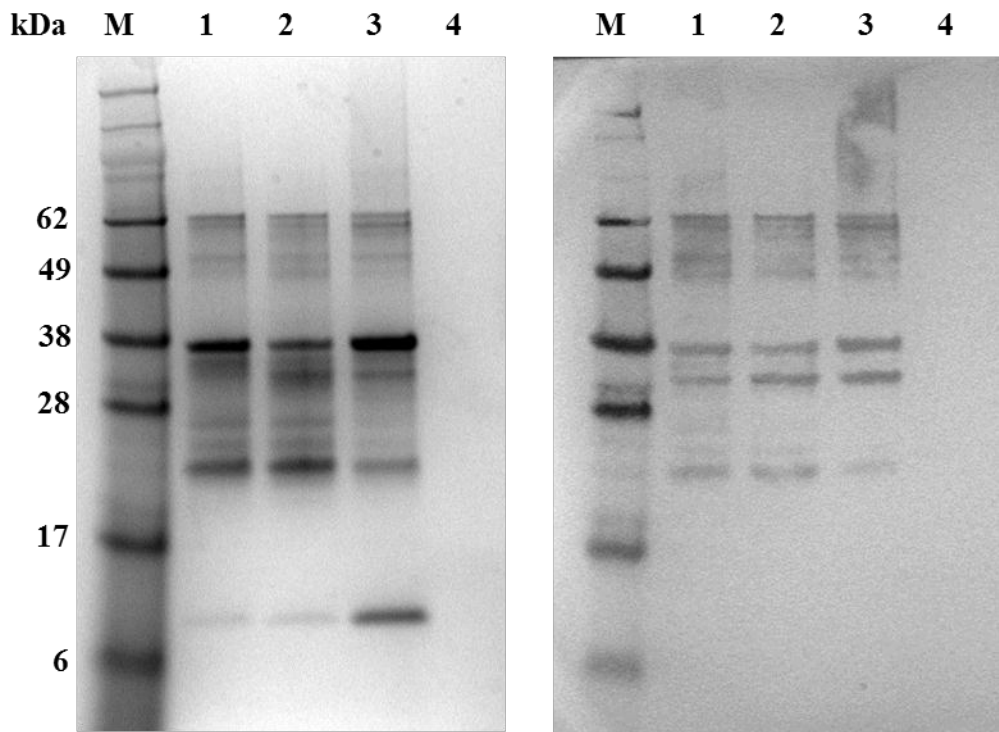

Figure S3

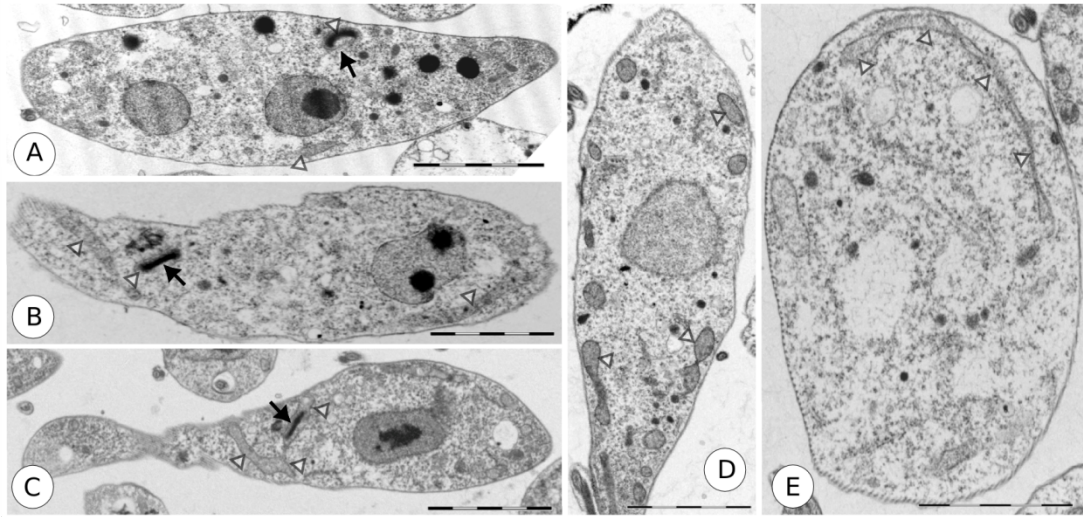

Figure S4
